# Supplementary material
Source: MDPI journal article supplement (https://www.mdpi.com/2072-4292/11/20/2394)
Supplement: s1 [file s1]

**Supplementary Materials**

**Table S1.** Matched paired analyses comparing corrected and uncorrected UAS–derived area differences from both aircraft to traditional GPS–derived reef areas. * denotes p–value < 0.05.

| **Site** | **N** | | | **Mean ΔGPS–UAS** | | | | **t Statistic** | | | **p–Value** | | **df** | | | **low**  **Confidence** | | | | | **high**  **Confidence** | |
| --- | --- | --- | --- | --- | --- | --- | --- | --- | --- | --- | --- | --- | --- | --- | --- | --- | --- | --- | --- | --- | --- | --- |
| Combined Sites |  | |  | | | |  | | |  | |  | | |  | | | | |  | |
| eBee | 10 | | –6.12 | | | | –3.01 | | | 0.01* | | | | 9 | –10.72 | | | –1.51 | | | | | | |
| Mavic | 8 | | –4.88 | | | | –2.54 | | | 0.04* | | | | 7 | –9.41 | | | –0.34 | | | | | | |
| Town Marsh | | | | |  | | | |  | | | | | | | |  | | | | | | |
| eBee | 5 | | –3.71 | | | | –1.12 | | | 0.33 | | | | 4 | –12.93 | | | 5.51 | | | | | | |
| Mavic | 5 | | –6.19 | | | | –2.07 | | | 0.11 | | | | 4 | –14.49 | | | 2.11 | | | | | | |
| Middle Marsh | |  | | | |  | | |  | | | | | | |  | | |  | | | | |
| eBee | 5 | | –8.52 | | | | –3.92 | | | 0.02* | | | | 4 | –14.56 | | | –2.49 | | | | | | |
| Mavic | 3 | | –2.69 | | | | –3.27 | | | 0.08 | | | | 2 | –6.23 | | | 0.85 | | | | | | |

**Table S2.** Wilcoxon matched paired analyses comparing corrected and uncorrected UAS–derived reef elevations from both aircraft to traditional GPS–derived reef elevations. * denotes p–value < 0.05.

| **Site** | **N** | **W Stat** | | **p–Value** |
| --- | --- | --- | --- | --- |
| Combined |  |  | | |
| eBee Corrected | 10 | –27.5 | 0.00* | |
| eBee Uncorrected | 10 | 13.5 | 0.19 | |
| Mavic Corrected | 8 | 6.0 | 0.46 | |
| Town Marsh |
| eBee Corrected | 5 | –7.5 | 0.06 | |
| eBee Uncorrected | 5 | –6.5 | 0.13 | |
| Mavic Corrected | 3 | 5 | 0.63 | |
| Middle Marsh |  |  | | |
| eBee Corrected | 5 | –7.5 | 0.06 | |
| eBee Uncorrected | 5 | 7.5 | 0.06 | |
| Mavic Corrected | 3 | 2 | 0.75 | |
